# Supplementary material
Source: PubMed Central journal article supplement (PMC7842869)
Supplement: AJSLP-29-819-s001.pdf [file AJSLP-29-819-s001.pdf]

## Supplemental Material S1

### List of codes Round 1

- 1 Academic concerns about child
- 2 Child’s academic success
- 3 Child interests
- 4 Family education
- 5 Family reaction to assessment and interaction with each other
- 6 Mom’s IEP concerns
- 7 Discuss the initial diagnostic experience
- 8 Mom’s feelings
- 9 Red flags seen in child’s language
- 10 Child’s social/emotional/behavioral development
- 11 Concerns about child’s speech
- 12 Concerns about treatment child received
- 13 Concerns about the child’s academics
- 14 The child’s age/grade
- 15 Comparison of the child to siblings/peers
- 16 The mom’s experience during the diagnosis
- 17 Receipt of an SLI DX
- 18 Receipt of a medical DX
- 19 Mom’s negative feelings
- 20 Mom reports have seen things beforehand “red flags”
- 21 Description of the child’s social/emotional/behavioral
- 22 Mom sees progress as a result of treatment
- 23 Discussion about the expectations for the child’s age/grade
- 24 Child received early childhood treatment
- 25 Mom’s concerns about education
- 26 Mom compares child to other children in the family
- 27 Mom expresses negative feelings
- 28 Mom describes the initial diagnostic process
- 29 Mom describes child’s development where she should have seen problem earlier
- 30 Description of child’s school treatment
- 31 Mom describes the child’s social/emotional/behavior
- 32 Mom talks about the child’s age when first seen
- 33 The mom didn’t know the diagnosis
- 34 There were negative family interactions when the family communicated
- 35 Mom discussed her feelings
- 36 The child’s learning traits at school
- 37 Concerns with the child’s social/emotional behavior
- 38 Concerns with child’s speech development
- 39 Discussed age child first was seen by SLP
- 40 Mom was concerned with the cost of receiving services
- 41 Discussed the difficult decision to have child tested
- 42 Educational concerns about their child

- 43 Family reaction to diagnosis, including husband siblings
- 44 Described school district diagnostic experience
- 45 Mom described the treatment she received during the IEP
- 46 Mom discussed her feelings
- 47 Parent perception of progress
- 48 Personality of child
- 49 Developmental concerns
- 50 Sibling comparison
- 51 Social/Emotional problems
- 52 Private clinic diagnostic experience
- 53 Private clinic SLP treatment
- 54 Adult’s reactions
- 55 Age of diagnosis
- 56 Assessment process
- 57 Awareness of language problems
- 58 Compared to other children
- 59 Cost of Therapy
- 60 Mom discusses her denial
- 61 Report of child’s developmental delay
- 62 Description of early education
- 63 Mom: Embarrassed
- 64 Mom: Frustration
- 65 Happy with good treatment
- 66 Group Treatment
- 67 Mom described guilt
- 68 Horrible experience with SLP
- 69 Initial assessment
- 70 Negative feedback from SLP
- 71 Child not at her level
- 72 Not receiving enough treatment
- 73 SLP is a poor communicator
- 74 Received poor treatment
- 75 Mom described poor understanding
- 76 Positive improvement from treatment
- 77 Progress information from SLP
- 78 Relief get services
- 79 Repetition
- 80 Seek more services
- 81 Separation anxiety of child
- 82 Child’s behavior: Shy
- 83 Child’s behavior: Social
- 84 Parent surprised by SLP
- 85 Reported terms of diagnosis
- 86 Teacher wanted to wait and see
- 87 Academic concerns from parent
- 88 Academic expectations of typical kids

- 89 Assessment with SLP
- 90 Attending language preschool
- 91 Beginning speech therapy
- 92 Cause of child language problems
- 93 Child behavior
- 94 Comparison to other kids
- 95 Concern about child’s communication
- 96 Concern about language
- 97 Description of language problems
- 98 Desire to help other families with the same problem
- 99 Diagnosis parent received
- 100 Getting appropriate levels of help
- 101 Getting treatment
- 102 Impact of problems
- 103 Individualized help
- 104 Information from other parents
- 105 Initial thoughts on language ability
- 106 Language ability
- 107 Language goal
- 108 Parent feelings about assessment
- 109 Progress
- 110 Reaction to diagnosis
- 111 Parent reaction
- 112 Reaction of other people
- 113 Receiving the diagnosis
- 114 Regret
- 115 School therapy
- 116 Speech language clinician
- 117 Things that might help
- 118 Things unsaid
- 119 Uncertainty of diagnosis

## List of codes Round 2

- 1 Academic Successes
- 2 Academic Expectations
- 3 Age parent first concerned
- 4 Cause of language disorder
- 5 Cost of treatment
- 6 Child Development Global Dev
- 7 Child Interests
- 8 Comparisons to sibling
- 9 Comparison to children same age
- 10 Concerns Education
- 11 Concerns Communication ability
- 12 Concerns IEP
- 13 Concerns Not at age level
- 14 Concerns Treatment amount
- 15 Concerns Treatment individualized
- 16 Description of the language problem
- 17 Diagnostic experience Negative
- 18 Diagnostic experience Positive
- 19 Diagnostic term No term
- 20 Diagnostic term SLI
- 21 Diagnostic term Other
- 22 Diagnostic Wait and see
- 23 Emotions Child Anxiety
- 24 Emotions Child Awareness
- 25 Emotions Child Embarrassment
- 26 Emotions Child Frustration
- 27 Emotions Child Other
- 28 Emotions Parent Anxiety
- 29 Emotions Parent Denial
- 30 Emotions Parent Dissatisfaction
- 31 Emotions Parent Embarrassment
- 32 Emotions Parent Frustration
- 33 Emotions Parent Guilt
- 34 Emotions Parent Regret
- 35 Emotions Parent Relief
- 36 Emotions Parent Surprise
- 37 Emotions Parent Uncertainty
- 38 Emotions Parent Other
- 39 Goals Family
- 40 Goals IEP
- 41 Goals Short term
- 42 Goals Long term
- 43 Impact of language Family
- 44 Impact of language Friends
- 45 Impact of Language Parents

- 46 Impact of Language Teacher
- 47 Impact of Language Siblings
- 48 Impact of Language SLP
- 49 Information Diagnostic
- 50 Information Disorder
- 51 Information Child progress
- 52 Information Source SLP
- 53 Information Source Other family friends
- 54 Information Treatment
- 55 Interaction SLP Negative
- 56 Interaction SLP Positive
- 57 Parent doesn’t remember
- 58 Personality Child Fun
- 59 Personality Child Creative
- 60 Personality Child Shy
- 61 Personality Child Smart
- 62 Personality Child Social
- 63 Personality Child Other
- 64 Progress perceived by friends
- 65 Progress perceived by family
- 66 Progress perceived by parents
- 67 Reactions to difficulties by family
- 68 Reactions to difficulties by friends
- 69 Reactions to difficulties by teacher
- 70 Therapy Early intervention
- 71 Therapy Private
- 72 Therapy School
- 73 Why parent became worried
- 74 Peers Positive Interaction
- 75 Peers Negative Interaction
- 76 Description of social behavior
- 77 Description of diagnostic
- 78 Description of treatment
- 79 Description of IEP process
- 80 Questions on coding

### List of codes Round 3

1. Description of child’s language
2. Description of general speech and language
3. Description of communication problem
4. Diagnosis of late development
5. Mom questioned the diagnosis
6. Child has a general delay
7. Delayed speech
8. Confusion about diagnosis
9. Diagnosis of cognitive delay
10. Description of low vocabulary
11. Diagnosis of non-specific SLI
12. Description of needing SLP services
13. Behind on reading
14. Expressive language problems
15. Ability behind peers
16. Speech problems
17. Learning problem
18. No description of diagnosis provided
19. Parental diagnosis of SLI
20. Comprehension problems
21. SLP unsure of diagnosis
22. Description: low enough to receive services
23. SLP disagrees with previous diagnosis
24. Mom wants a known diagnostic label
25. Concern that assessment didn’t match child’s issues
26. Emotions expressed at time of assessment
27. General written information
28. General verbal information
29. Differential diagnostic information
30. Information medically based with an interpretation
31. Explains information provided
32. Review of goals
33. Setting new goals
34. Goals not addressed
35. Cause of language disorder
36. Explanation for lack of treatment/amount of treatment
37. Information obtained from public resources
38. Concerns over classroom/preschool teacher
39. Information provided was too complex
40. SLP provided detailed information parent couldn’t remember
41. Conflicting information provided by SLPs
42. Educational/academic concerns
